# Supplementary material
Source: MDPI journal article supplement (https://www.mdpi.com/2311-7524/9/12/1308)
Supplement: s1 [file s1]

**Supplemental Table S1.** Morphological observations on specific *V. vitis-idaea* × *V. fuscatum* hybrids and *V. vitis-idaea* × *V. elliotii* hybrids in spring 2023. Notes on deciduous vs. Non-deciduous appearance are based upon winter storage in a cold greenhouse, but maintained at above freezing temperatures.

| Genotype                                                                   | Observations                                                                                                                                                                                                                                                                                                                                                          |
|----------------------------------------------------------------------------|-----------------------------------------------------------------------------------------------------------------------------------------------------------------------------------------------------------------------------------------------------------------------------------------------------------------------------------------------------------------------|
| <b><i>V. vitis-idaea</i> ‘Red Sunset’ × <i>V. fuscatum</i> US 2028</b>     |                                                                                                                                                                                                                                                                                                                                                                       |
| <b>US 2524-A</b>                                                           | Plant: upright, multi-stemmed, non-rhizomatous, non-deciduous, 45 cm. Stems: slightly verrucose, pale reddish purple on exposed side, medium green on shaded side. Foliage: textured, dark green with hints of purple, new foliage bright green. Flowers: campanulate, white, 5mm (L) x 6mm (W), stigma extending, total length ~7mm, 8-10 flowers per inflorescence. |
| <b>US 2524-B</b>                                                           | Plant: upright, multi-stemmed, non-rhizomatous, largely deciduous, 44 cm. Stems: slightly verrucose, purplish on exposed side, medium-light green on shaded side. Foliage: dark green, new foliage bright green. Flowers: few flowers, campanulate, white, 6 flowers per inflorescence (one inflorescence).                                                           |
| <b>US 2524-C</b>                                                           | Plant: upright, multi-stemmed, non-rhizomatous, non-deciduous, 30 cm. Stems: slightly verrucose, purple all around. Foliage: strongly textured, dark green to purple bronzed, new foliage bright green. Flowers: campanulate, white, 5mm (L) x 6mm (W), stigma extending, total length ~8-10mm, 7-8 flowers per inflorescence (mostly 8).                             |
| <b>US 2524-D</b>                                                           | Plant: dwarfish, spreading-upright, multi-stemmed, non-rhizomatous, non-deciduous, 13 cm. Stems: slightly verrucose, medium green, very short internodes. Foliage: mostly dark green with some bronzing, new foliage bright green. Flowers: up to 11 flowers per inflorescence (9 typical?).                                                                          |
| <b><i>V. vitis-idaea</i> ‘Sanna’ × <i>V. fuscatum</i> US 2028</b>          |                                                                                                                                                                                                                                                                                                                                                                       |
| <b>US 2526-A</b>                                                           | Plant: upright, multi-stemmed, non-rhizomatous, partly deciduous (60% of leaves lost/40% retained), 46 cm. Stems: slightly verrucose, uniform purple. Foliage: dark green to bronzed purple, new foliage bright green. Flowers: campanulate, white, 5mm (L) x 6mm (W), stigma extending, total length ~7mm, up to 8 flowers per inflorescence.                        |
| <b>US 2526-B</b>                                                           | Plant: upright-spreading (weaker), fewer stems, non-rhizomatous, largely deciduous, 21 cm. Stems: slightly verrucose, mostly green, slight purple on some. Foliage: green, reduced leaf size, new foliage bright green. Flowers: none to date.                                                                                                                        |
| <b><i>V. vitis-idaea</i> ‘Red Sunset’ × <i>V. elliotii</i> NJ 88-04-10</b> |                                                                                                                                                                                                                                                                                                                                                                       |
| <b>US 2525-A</b>                                                           | Plant: upright, multi-stemmed, non-rhizomatous, largely deciduous, 28 cm. Stems: slightly verrucose, mostly medium green, scabby. Foliage: moderate leaf texture, medium green, new foliage light green, smaller leaves than US 2524-#s. Flowers: less campanulate, more rounded than US 2524-#s, white, pinkish cast before open, up to 8 flowers per inflorescence. |
| <b>US 2525-B</b>                                                           | Plant: upright-spreading, multi-stemmed, non-rhizomatous, approximately 50% foliage lost/50% retained, 19 cm. Stems: slightly verrucose, slight purple cast. Foliage: medium green, new foliage light green, smaller leaves than US 2525-A. Flowers: none to date.                                                                                                    |
